# Supplementary material
Source: PubMed Central journal article supplement (PMC10589059)

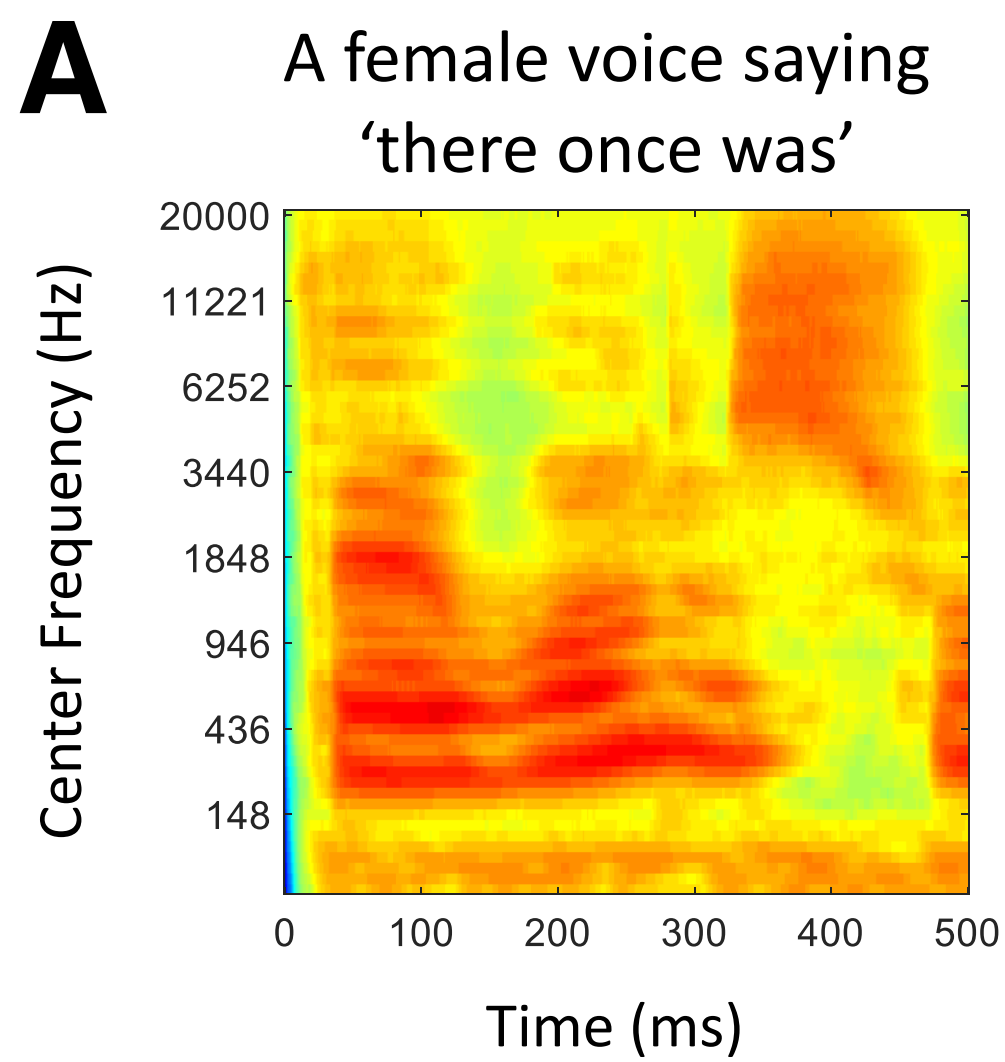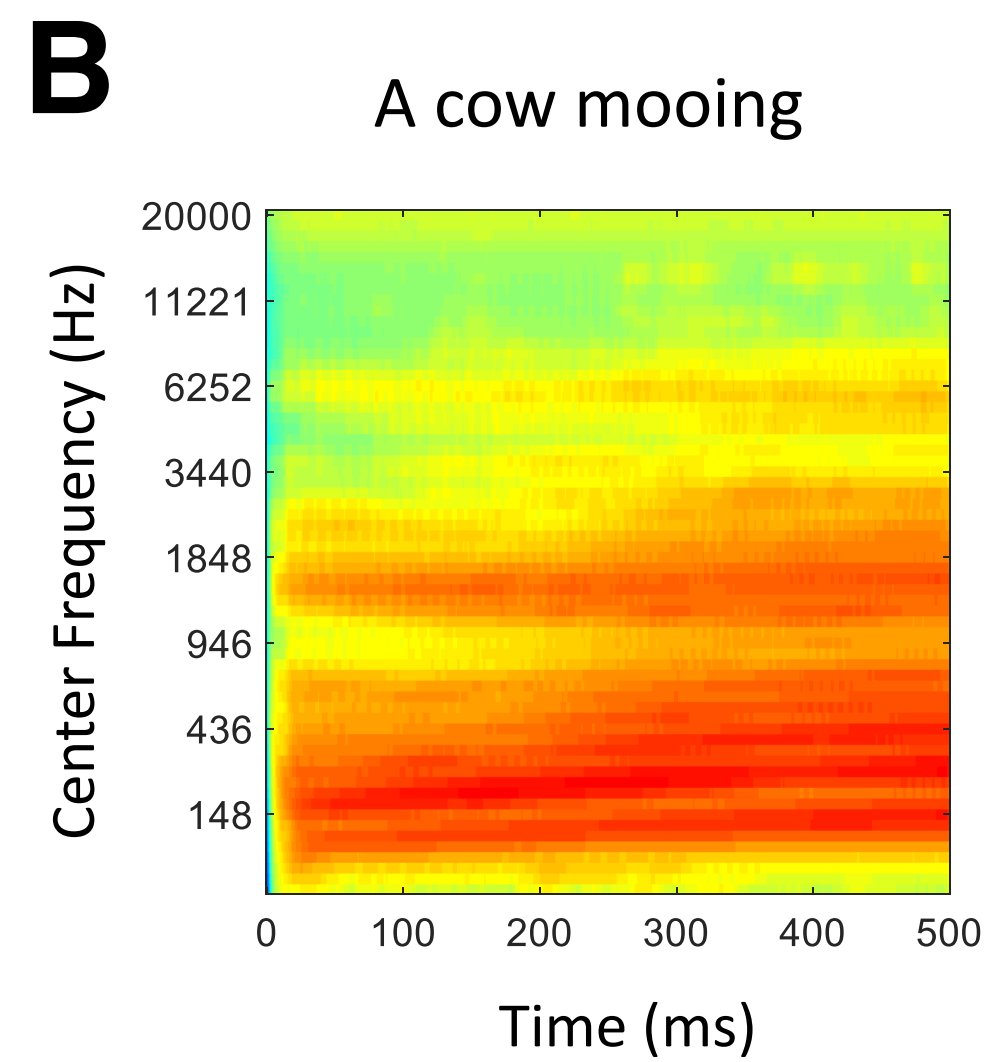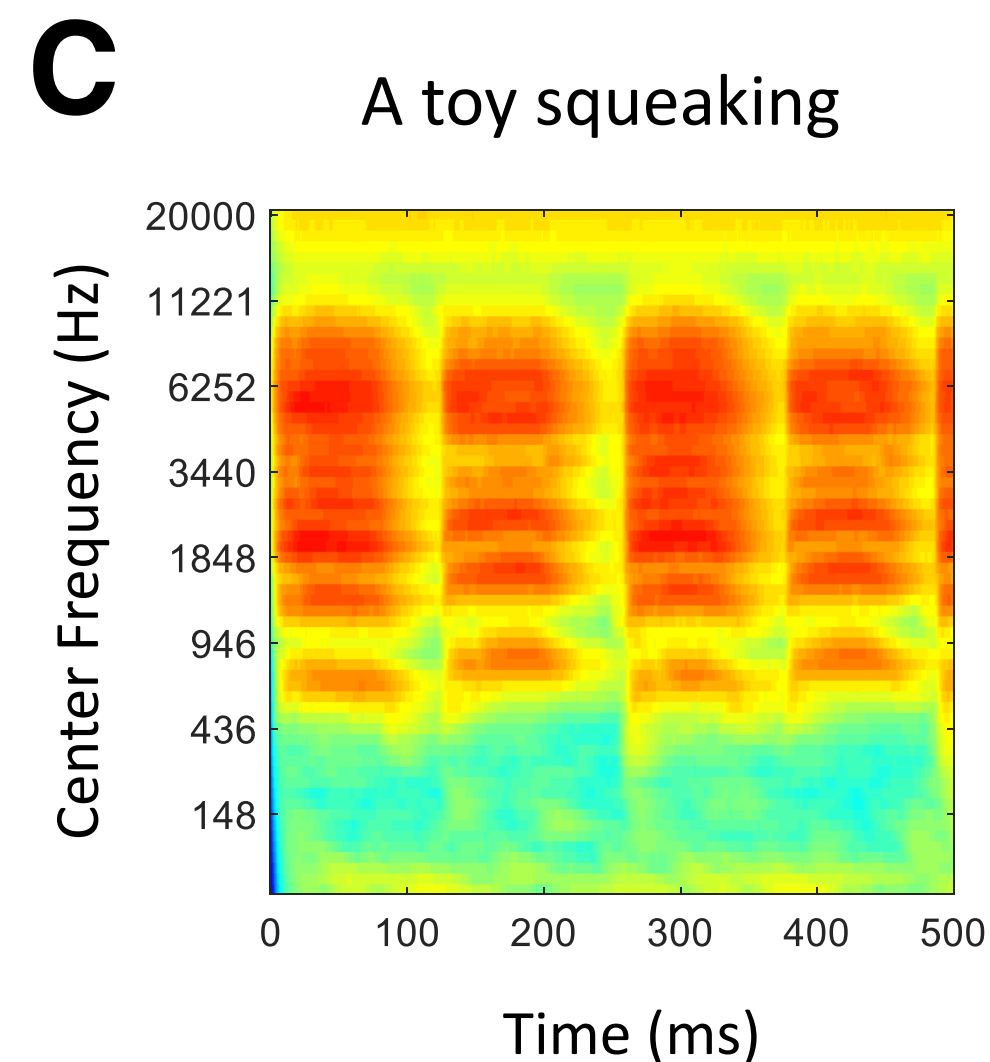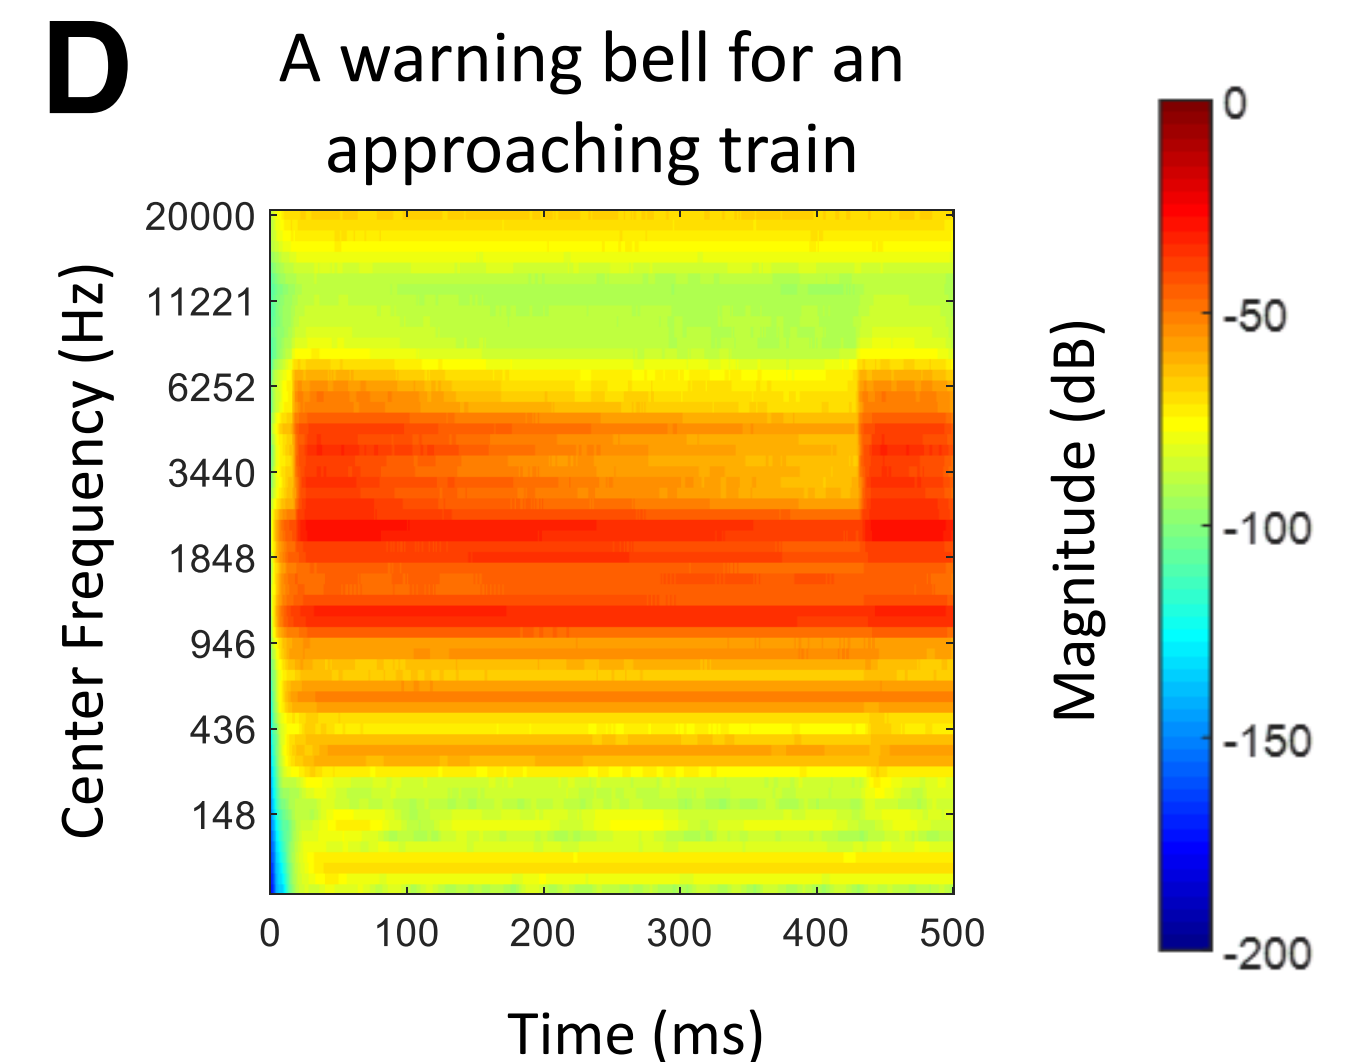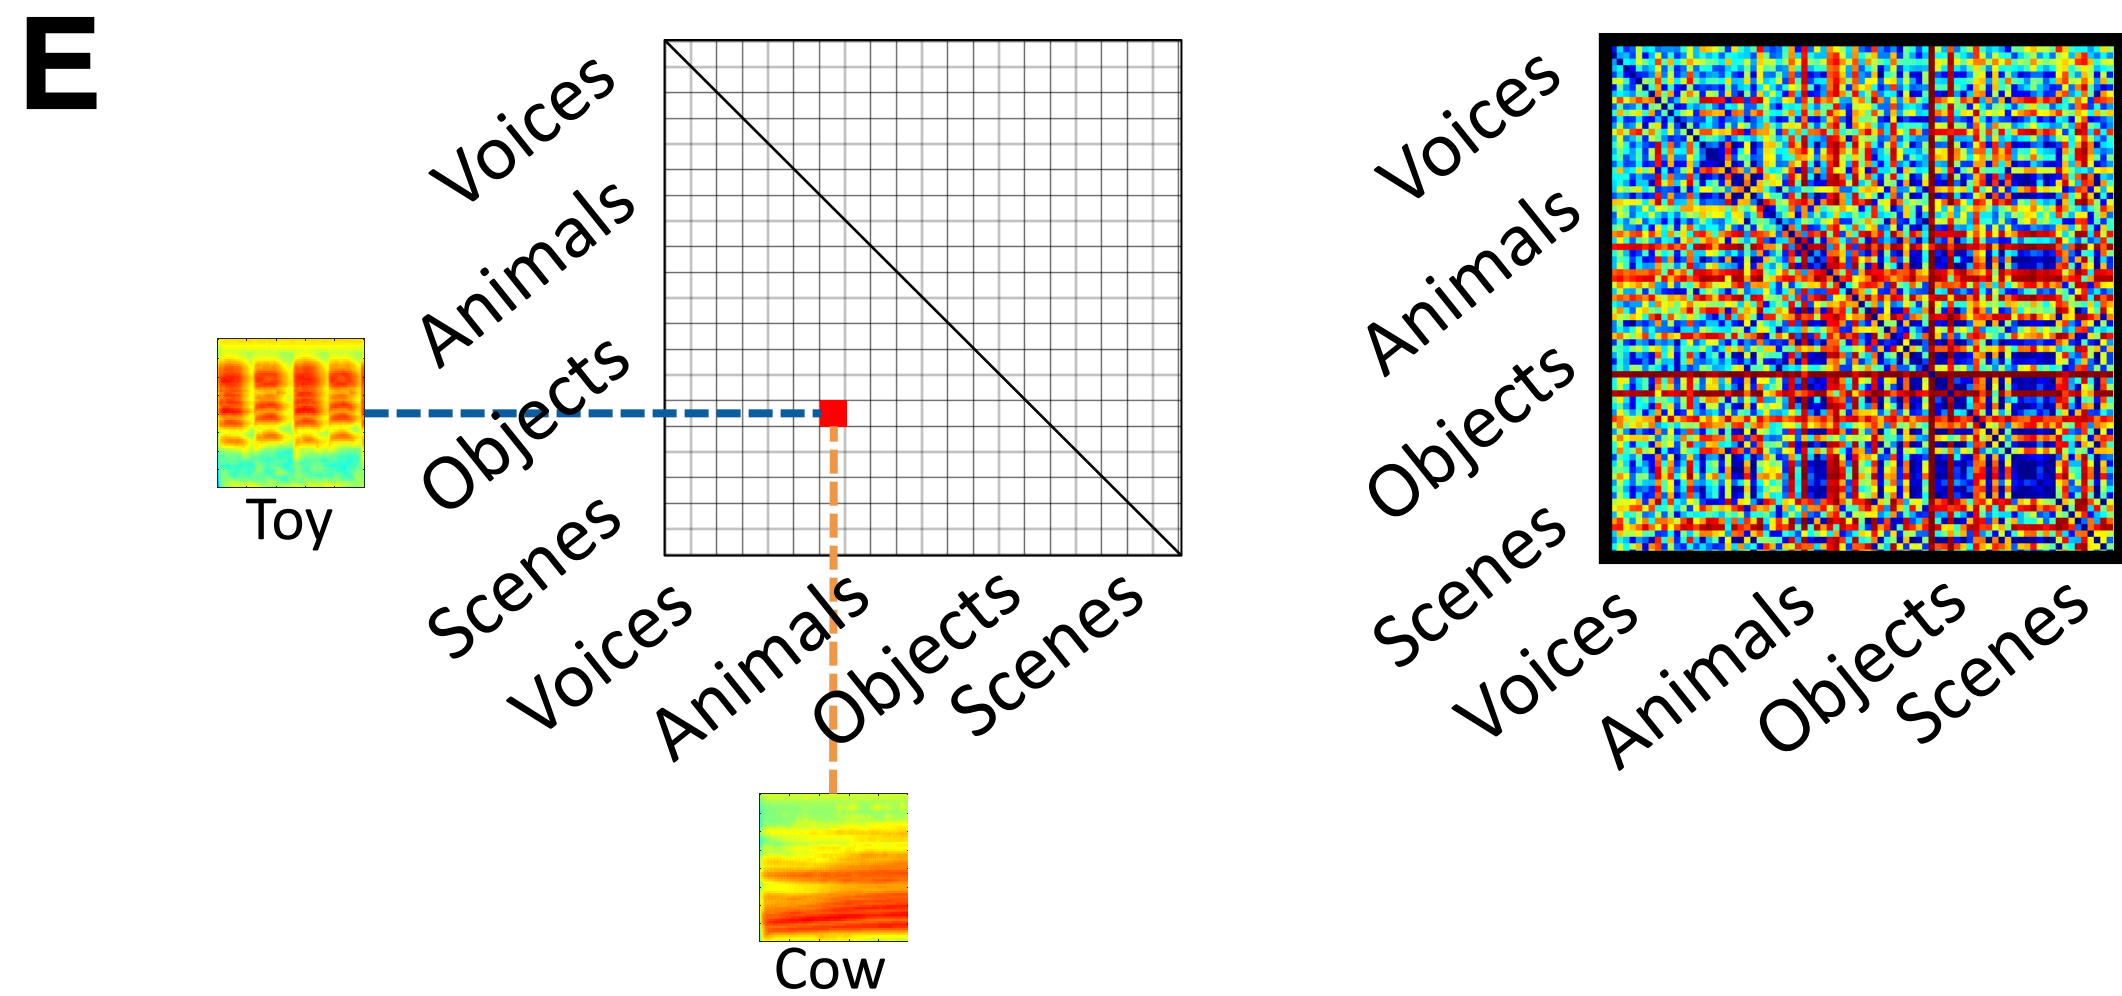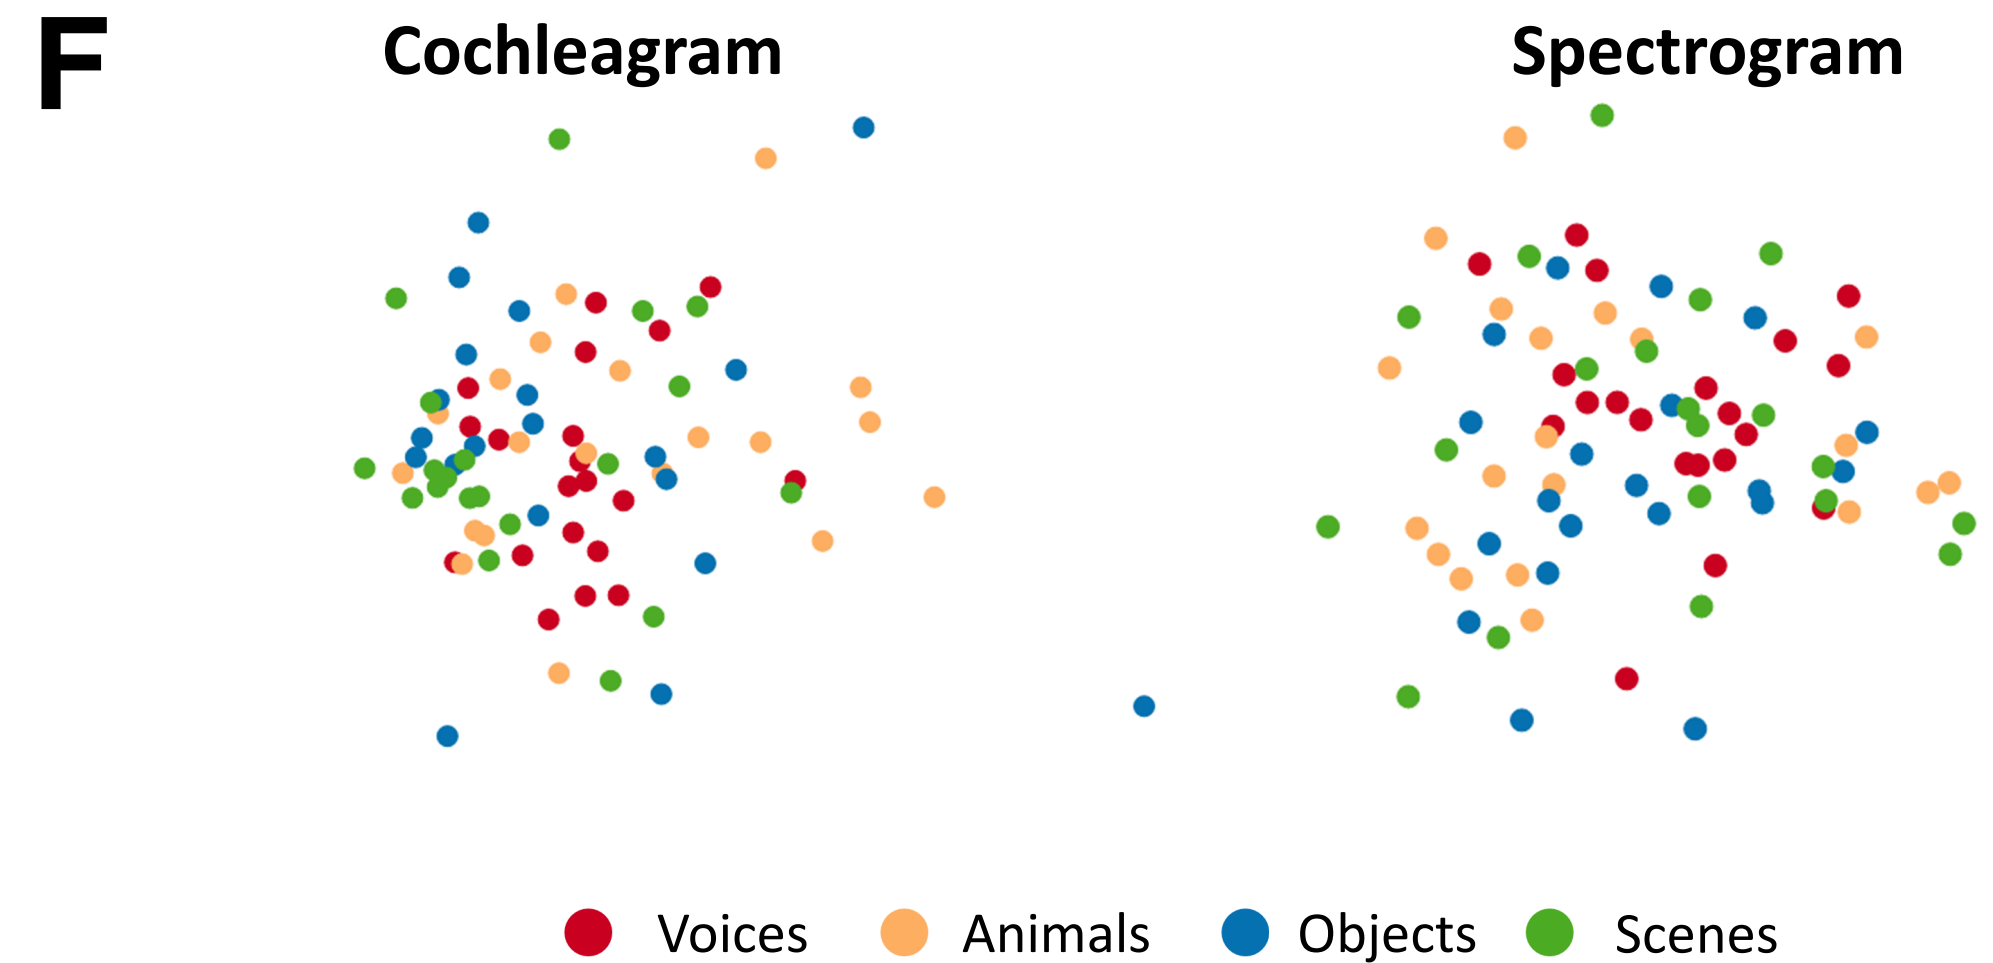

Supplement: NIHMS1812386-supplement-Figure_S1.pdf [file NIHMS1812386-supplement-Figure_S1.pdf]

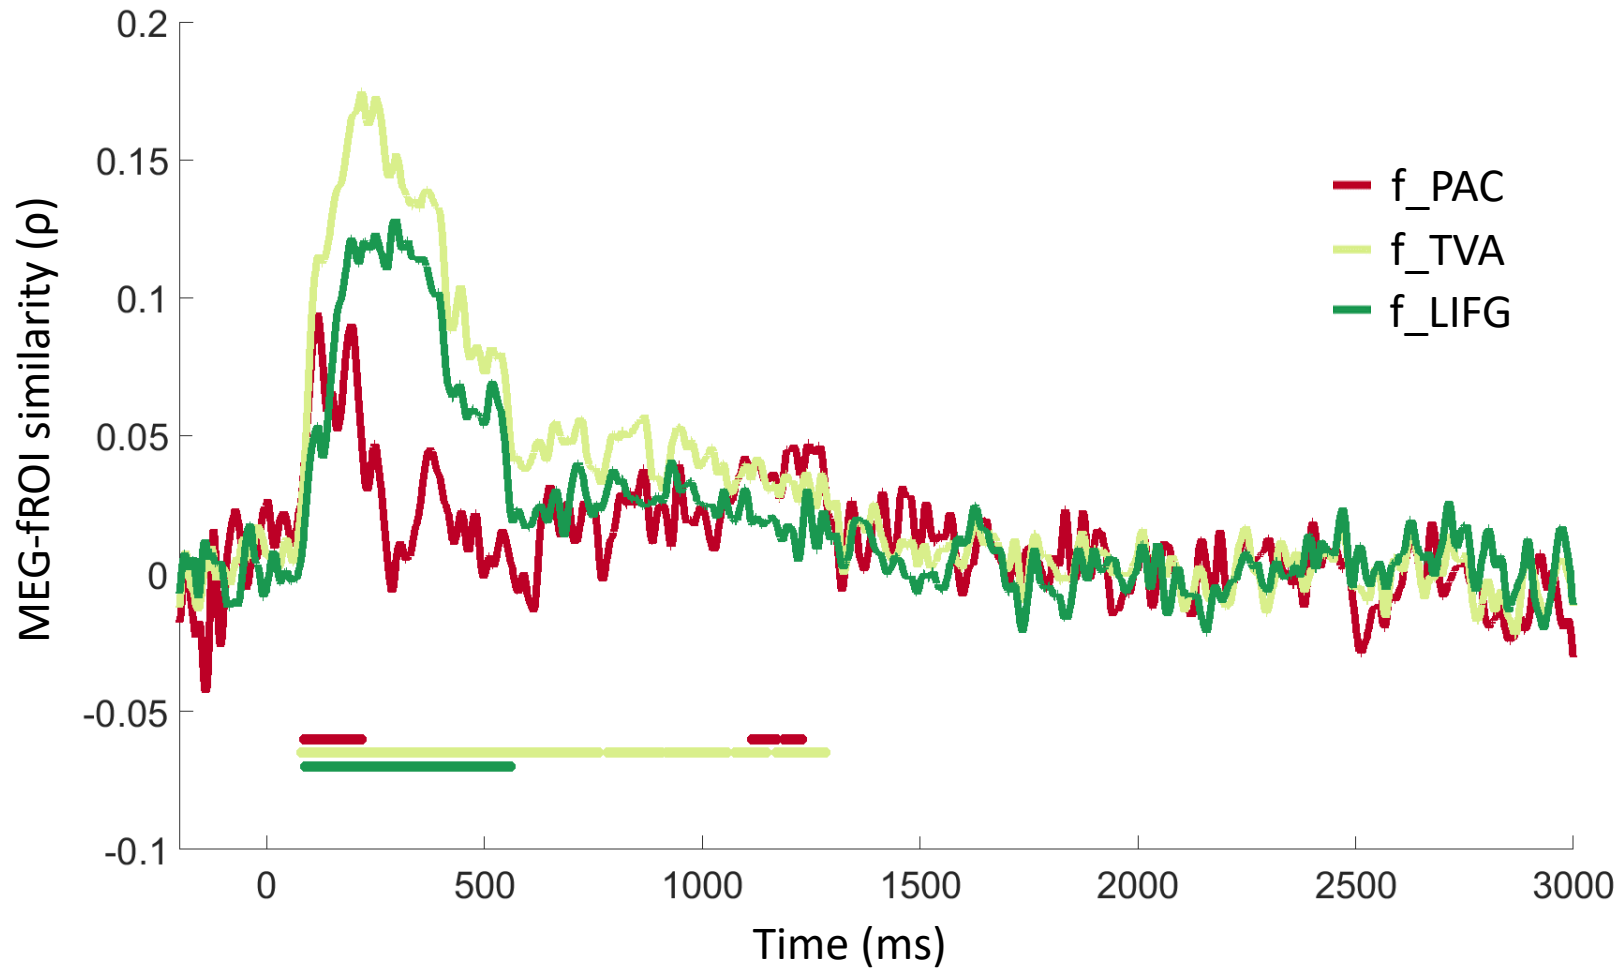

Supplement: NIHMS1812386-supplement-Figure_S2.pdf [file NIHMS1812386-supplement-Figure_S2.pdf]
